# Supplementary material for: Sp1-Mediated Prdx6 Upregulation Leads to Clasmatodendrosis by Increasing Its aiPLA2 Activity in the CA1 Astrocytes in Chronic Epilepsy Rats
Source: Antioxidants (Basel). 2022 Sep 23;11(10):1883. doi: 10.3390/antiox11101883 (PMC9598987; doi:10.3390/antiox11101883)
Supplement: Supplementary file 1 [file antioxidants-11-01883-s001.zip › antioxidants-1871815-supplementary.pdf]

## Supplementary information

# **Sp1-mediated Prdx6 upregulation leads to clasmatodendrosis by increasing its aiPLA2 activity in the CA1 astrocytes in chronic epilepsy rats**

Ji-Eun Kim<sup>1,2</sup>, Duk-Shin Lee<sup>1,2</sup> and Tae-Cheon Kang<sup>1,2\*</sup>

<sup>1</sup> Department of Anatomy and Neurobiology, College of Medicine, Hallym University, Chuncheon 24252, South Korea

<sup>2</sup> Institute of Epilepsy Research, College of Medicine, Hallym University, Chuncheon 24252, South Korea

\* Correspondence to: T. -C. Kang, Department of Anatomy and Neurobiology, College of Medicine, Hallym University, Chuncheon, Kangwon-Do 24252, South Korea; Tel: +82-33-248-2524; Fax: +82-33-248-2525; E-mail: tckang@hallym.ac.kr

**Supplementary Table S1. Primary antibodies used in the present study.**

| Antigen        | Host   | Manufacturer (catalog number) | Dilution used                |
|----------------|--------|-------------------------------|------------------------------|
| Prdx6          | Sheep  | Biosensis (S-073-100)         | 1:1,000 (IH)<br>1:2,000 (WB) |
| Nrf2           | Rabbit | Invitrogen (PA5-88084)        | 1:100 (IH)<br>1:2,000 (WB)   |
| LAMP1          | Rabbit | Abcam (#ab24170)              | 1:100 (IH)                   |
| GFAP           | Mouse  | Millipore (#MAB3402)          | 1:2,000 (IH)                 |
| Sp1            | Rabbit | Elapscience (ENT4372)         | 1:100 (IH)<br>1:1,000 (WB)   |
| $\beta$ -actin | Mouse  | Sigma (#A5316)                | 1:5,000 (WB)                 |

IH: Immunohistochemistry; WB: Western blot

**Fig. 3C**

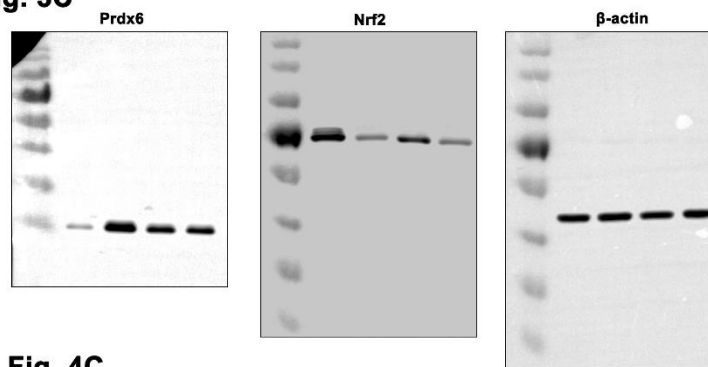

**Fig. 4C**

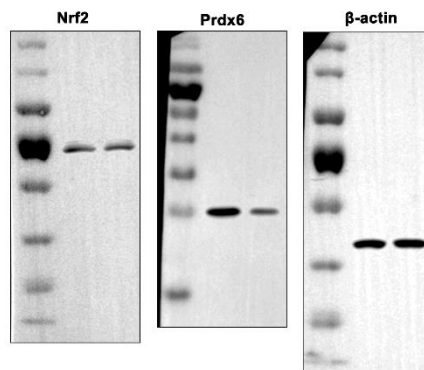

**Fig. 5C**

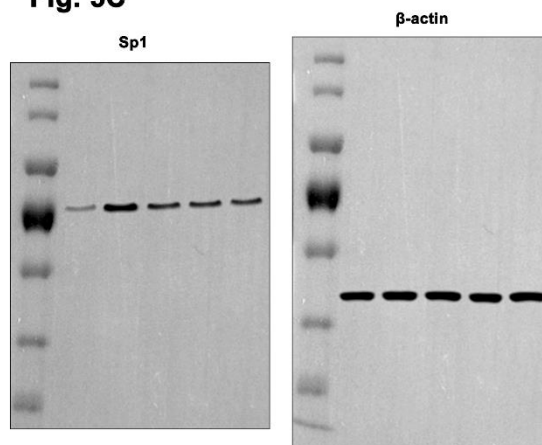

**Supplementary Figure S1.** Full-length gel images of Western blot data in Figure 3C, 4C and 5C.
